# Supplementary material
Source: Research Square preprint supplement (doi:10.21203/rs.3.rs-10368790/v1)
Supplement: Supplementary file 1 [file 496b29a325d3d6ecf83cb598.xlsx]

## Sheet: Master Table
#	Abstract	Type	First author	Institution	Disease site	Setting / question	Design	Comparator	n (matched/analyzed)	Key result (effect, 95% CI)	Direction	File ID	Notes
1	10506	Oral	McDonald	Penn / ACR	Breast	Primary prevention / incidence	Retrospective, TriNetX, PSM	Non-user	15,264/arm	BC 1.62% vs 2.31%; OR ~0.70; ARR 0.69% (0.38–1.01)	Favorable	260663	Published JCO Oncol Pract; INSPIRE prospective trial planned
2	10520	Poster	Gotera	UT San Antonio / MDA	Breast	Primary prevention (high-risk obesity)	Retrospective, TriNetX, PSM	Non-user	40,240/arm	BC 2.95% vs 3.07%; HR 0.844 (0.779–0.915)	Favorable	263920	Effect in postmenopausal only; GI AEs higher
3	10548	Poster	Z. Shah	Roswell Park	Breast	Incidence + survival (non-diabetic, BMI 25–35)	Retrospective, TriNetX, PSM	Non-user	74,354/arm	HR+/HER2- incidence RR 0.88 (0.77–0.99); OS HR 0.75 (0.65–0.86)	Favorable	263913	Subtype RRs (HER2+, TNBC) non-significant
4	639	Poster	Prior	Mayo Clinic	Breast	Survival	Single-center database, UNMATCHED	Non-user	88,015 (3,919 users)	5-yr OS 98.5% vs 85.5%; uniform across subtype/BMI/age	Favorable	265867	Exhibit A: no PSM; uniform ~99% OS = confounding-shaped
5	629	Poster	Sukumar / Jackson	MD Anderson	Breast	Survival / treatment patterns	Retrospective, MarketScan, PSM	Non-user	7,239/arm	5-yr OS 95.8% vs 91.3%; adj HR 0.48 (0.40–0.57)	Favorable	267283	Semaglutide most common; use rising post-2018
6	1070	Poster	Palleschi	IRST Romagna	Breast (metastatic)	Survival, concurrent CDK4/6i + ET	Retrospective, TriNetX, PSM	Non-user	604 pairs	mOS 67.9 vs 49.0 mo; HR 0.70 (0.56–0.89)	Favorable	263048
7	1100	Poster	Patino	Emory	Breast (metastatic)	Concurrent CDK4/6i — safety	Matched case-control	CDK4/6i alone	41/arm	No increase in CDK4/6i ADRs; PFS preserved (p=0.96)	Favorable	261564	Small n; OS not yet mature
8	628	Poster	Yesho	Jefferson	Breast (supportive)	Prevention of post-mastectomy lymphedema	Retrospective, TriNetX, PSM	Non-user	30,815/arm	PML 0.88% vs 2.58%; HR 0.37 (0.32–0.43); NNT 59	Favorable	265783	Supportive-care endpoint, not a cancer outcome
9	10559	Poster	Neely	Jefferson	Lung	Primary prevention / incidence (high-risk)	Retrospective, TriNetX, PSM	Non-user	matched	Incidence 2.0% vs 2.4%; HR 0.69 (0.62–0.76); NNT 250	Favorable	263937
10	8636	Poster	Shaverdashvili	Jefferson	NSCLC (metastatic)	Survival, concurrent TKI	Retrospective, TriNetX, PSM	Non-user	matched	5-yr OS all-TKI HR 0.46 (0.36–0.59); ALK 0.22; EGFR 0.54; BRAF 0.61 (NS)	Favorable	265976	Largest effect in ALK subgroup
11	8598	Poster (abstr)	Ng	LSU / multi	Lung	Survival, concurrent ICI	Retrospective, TriNetX, PSM	Non-user	2,013/arm	All-cause mortality HR 0.65 (0.59–0.71); fewer ICU/hosp	Favorable	Lung_cancer_abstract_only.pdf
12	3636	Poster	Kinsey	VCU Massey	Colorectal	Recurrence / survival (stage I–III)	Retrospective, TriNetX, PSM	Non-user	839/arm	RFS HR 0.37 (0.25–0.45); 5-yr OS HR 0.45	Favorable	262248	Recurrence 7% vs 21%
13	3661	Poster	Krishnan	Atrium Health Levine	Colorectal	Survival, concurrent chemo + toxicity	Retrospective, Blue Diamond, PSM	Non-user	2,412/arm	OS HR 0.82 (0.76–0.89); reduced chemo toxicity	Favorable	262263	FOLFOX 0.81 / FOLFIRI 0.84; larger benefit BMI>=30
14	3605	Poster	Rawal	NY Medical College	Colorectal (metastatic)	Survival, concurrent ICI	Retrospective, TriNetX, PSM	Non-user	138/arm	1-yr mortality 27.5% vs 40.6%; HR 0.67 (0.49–0.95)	Favorable	262587	Small n; fewer pneumonia / HF exacerbation
15	5543	Poster	Arya	Mayo Clinic	Endometrial (+obesity)	Survival / metastasis	Retrospective, TriNetX, PSM	Non-user	6,352/arm	Overall mortality HR 0.45 (0.39–0.51); fewer mets, sepsis	Favorable	258126	Same outcome basket as myeloma 7548 (same group template)
16	5625	Poster	González-Merino	GEICO (Spain)	Endometrial	Biomarker — GLP-1R expression	Tissue microarray, 192 tumors	—	192 tumors	GLP-1R+ in 32%; highest in NSMP (41.9%); PR-associated	Biomarker (n/a)	258147	Not an outcome study; supports mechanism / target presence
17	e16276	Pub-only	Velez-Mejia	VCU Massey	Hepatobiliary / pancreatic	Survival	Retrospective, TriNetX, PSM	Non-user	3,607/arm	Better OS (p<0.001); 24-mo 80% vs 56%	Favorable	Pancreatic_abstract.pdf
18	e16462	Pub-only	O'Connor	Penn / Michigan	Pancreatic (PDAC)	Stage at diagnosis	Retrospective matched cohort 2:1	Non-user	88 / 176	Later-stage dx: BRPC vs resectable +21.7 pts (p=.035); 27% vs 39% curative resection	Unfavorable	abstract_small_pancreas.pdf	Detection / lead-time harm: satiety masks early PDAC symptoms
19	e17148	Pub-only	King	Jefferson / UT SA	Prostate	Incidence / outcomes	Retrospective, TriNetX, PSM	SGLT2i / neither	very large	SGLT2i PCa OR 0.84 (0.81–0.88); GLP-1 arm partial on p.1	Favorable (partial)	ABSTRACT264901__1_.pdf	Primarily an SGLT2i-vs-GLP-1 comparison
20	4620	Poster	Yaniv / Trivedi	UMass Chan	Bladder (NMIBC)	Outcomes, concurrent BCG	Retrospective, TriNetX, PSM	Non-user	787/arm	Mortality RR 0.65 (0.45–0.93); MIBC progression RR 0.43 (0.26–0.89)	Favorable	263335	Recurrence, distant mets, cystectomy non-significant
21	e16499	Pub-only	Kherajani	SUNY Upstate	Small intestine	Safety / incidence	Retrospective, TriNetX, PSM	Non-user	matched	Malignant SI neoplasm ARR 3.2% at 10y; no increased risk	Favorable (safety)	small_intestine_abstract.pdf	Tested a harm hypothesis and found none — argues against pure pub bias
22	6592	Poster	Chen	Univ. of Florida	Hematologic	Incidence	Retrospective, Medicare, PSM	DPP-4i (active)	matched	Lower MDS / lymphoma / leukemia / NHL composite; some subtypes NS	Favorable	258802	Active comparator (DPP-4i) = stronger design
23	10507	Oral	C. Jones	Mays / MDA	Leukemia	Primary prevention	Retrospective, TriNetX, PSM (trial emulation)	Non-user	147M+ screened	AML incidence reduced ~51% (71% in chemo cohort); only GI AEs increased	Favorable	267225
24	7548	Poster	Syal	Mayo Clinic	Multiple myeloma (+obesity)	Survival / mortality	Retrospective, TriNetX, PSM	Non-user	1,712/arm	Overall mortality HR 0.42 (0.35–0.51)	Favorable	261347	Same outcome template as endometrial 5543
25	3143	Poster	Orland	Cleveland Clinic	Multi-tumor (7 solid)	Metastatic progression (stage I–III to IV)	Retrospective, TriNetX, PSM	DPP-4i (active)	~12,112	Stage IV: NSCLC 10% vs 22%; breast 10% vs 22%; CRC 13% vs 22%; HCC 19% vs 28% (sig); prostate/panc trend (NS); TCGA GLP-1R->survival	Favorable	260931	Flagship; active comparator + biomarker corroboration = sturdiest
26	10508	Oral	V. Shah	Medical College of Georgia	Multi-tumor (13 cancers)	Incidence + mortality (tirzepatide)	Retrospective, TriNetX, PSM	Insulin / metformin	matched	vs insulin: lung HR 0.037, liver 0.042, etc.; vs metformin: breast HR 0.46 (0.25–0.84); lower ACM	Favorable	260662	HRs near 0.04 are biologically implausible -> insulin-comparator confounding
27	10583	Poster	Asad / Durmishi	Texas Tech	Multi-tumor (moderate CKD)	Incidence + mortality	Retrospective, TriNetX, PSM	Non-user	28,948/arm	ACM RR 0.70; any malignancy RR 0.57; lung 0.56 / CRC 0.77 / HCC 0.63 sig; pancreatic / kidney / prostate / breast NS	Favorable (mixed)	267373	Several site-specific results non-significant
28	10590	Poster	Vobugari	Univ. of Minnesota	Multi-tumor	Incidence (SGLT2i vs GLP-1 vs DPP-4i)	Retrospective, MarketScan, trial emulation	Active (DPP-4i / GLP-1)	matched	SGLT2i vs GLP-1 HR 0.97 (0.91–1.04, NS); both lower vs DPP-4i	Neutral/null	263909	No distinct GLP-1 benefit; SGLT2i-focused
29	11000	Oral	Jajja	Multi-institutional	Multi-tumor (on ICI)	Survival + immune-related AEs	Retrospective, TriNetX, PSM	Non-user	~3,429 matched	OS 3-yr HR 0.69 (0.64–0.75); 5-yr 0.71; pyrexia reduced; 1-yr NS	Favorable	259645
30	11017	Rapid Oral	Paulus	US Oncology / Ontada	Multi-tumor (6 solid)	Survival	Retrospective, iKnowMed EHR, PSM	Non-user	1,121 vs 3,894	OS adj HR 0.63 (0.45–0.90); PS-adj HR 0.66 (0.45–0.97)	Favorable	267360	Candid limitations; E-value 2.4 for unmeasured confounding

## Sheet: Summary
ASCO 2026 — GLP-1 & cancer: abstract tally
Total unique abstracts	30
By direction
Favorable	24
Favorable (mixed)	1
Favorable (partial)	1
Favorable (safety)	1
Unfavorable	1
Neutral/null	1
Biomarker (n/a)	1
By presentation type
Oral	4
Rapid Oral	1
Poster	20
Poster (abstr)	1
Pub-only	4
By disease site
Breast	5
Lung	2
NSCLC (metastatic)	1
Colorectal	2
Colorectal (metastatic)	1
Endometrial	1
Endometrial (+obesity)	1
Hepatobiliary / pancreatic	1
Pancreatic (PDAC)	1
Prostate	1
Bladder (NMIBC)	1
Small intestine	1
Hematologic	1
Leukemia	1
Multiple myeloma (+obesity)	1
Multi-tumor (7 solid)	1
Multi-tumor (13 cancers)	1
Multi-tumor (moderate CKD)	1
Multi-tumor	1
Multi-tumor (on ICI)	1
Multi-tumor (6 solid)	1
